# Supplementary material
Source: PubMed Central journal article supplement (PMC5426972)

Fig. S5 CD44+ cells in mice xenograft tumors derived from prostate cancer cell lines

■ CD44 FITC antibody  
■ negative control

DU145

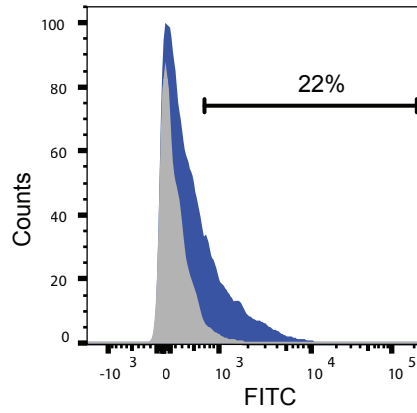

PC3

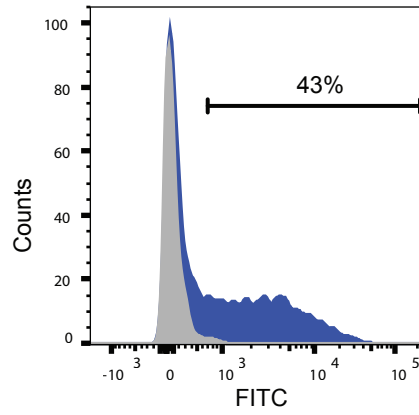

LACP9

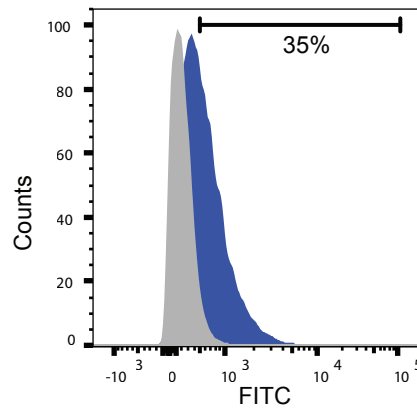

Supplement: NIHMS820863-supplement-11.pdf [file NIHMS820863-supplement-11.pdf]
