# Supplementary material
Source: PubMed Central journal article supplement (PMC5426972)

Fig. S1 miR-383 overexpression in prostate cancer cell lines

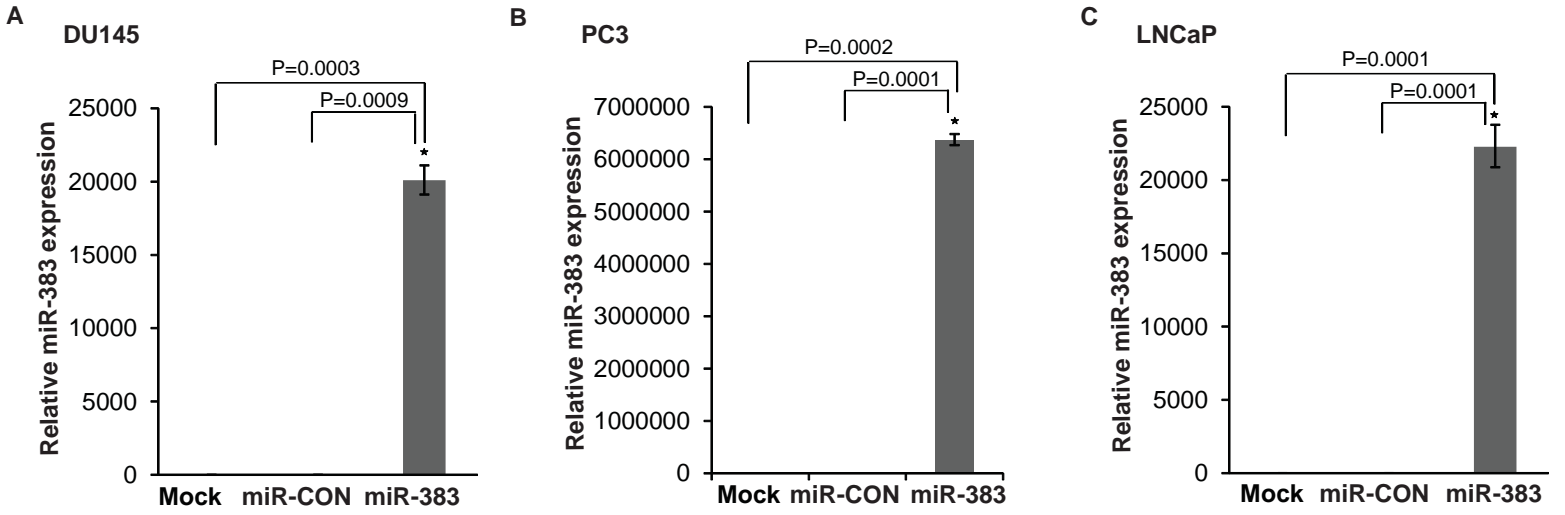

Supplement: NIHMS820863-supplement-7.pdf [file NIHMS820863-supplement-7.pdf]

Fig. S3 miR-383 and stemness related gene targets

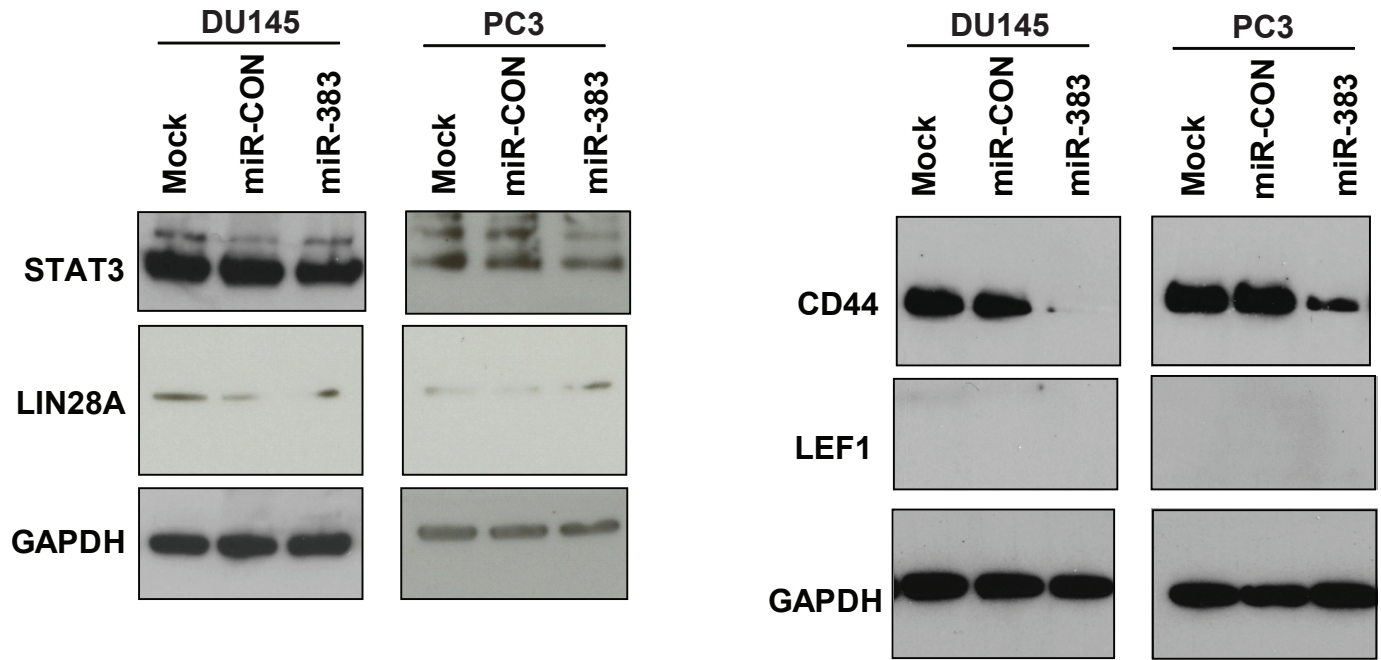

Supplement: NIHMS820863-supplement-9.pdf [file NIHMS820863-supplement-9.pdf]
